# Supplementary material for: Acute microglia ablation induces neurodegeneration in the somatosensory system
Source: PubMed Central journal article supplement (PMC6212411; doi:10.1038/s41467-018-05929-4), 2018-11-01
Supplement: 41467_2018_5929_MOESM2_ESM.pdf [file 41467_2018_5929_MOESM2_ESM.pdf]

**Editorial Note:** This manuscript has been previously reviewed at another journal that is not operating a transparent peer review scheme. This document only contains reviewer comments and rebuttal letters for versions considered at Nature Communications.
